# Supplementary material
Source: publisher site journal article supplement (https://www.dovepress.com/article/371506)
Supplement: Supplementary file 1 [file get_supplementary_file.php]

**Supplementary table 1: Echocardiographic data at 3-week and 6-week after surgery in each group rats**

| **Parameter** | **3-week** | | | | |  | **6-week** | | | | |
| --- | --- | --- | --- | --- | --- | --- | --- | --- | --- | --- | --- |
| **Sham** | **AMI+Vehicle** | **AMI+DAPA Low** | **AMI+DAPA Med** | **AMI+DAPA High** |  | **Sham** | **AMI+Vehicle** | **AMI+DAPA Low** | **AMI+DAPA Med** | **AMI+DAPA High** |
| IVSs, mm | 2.46±0.21 | 2.21±0.50 | 2.05±0.55 | 2.46±0.35 | 2.00±0.30 |  | 2.95±0.20 | 2.11±0.54* | 2.18±0.42* | 2.55±0.71 | 2.22±0.42* |
| IVSd, mm | 1.47±0.12 | 1.46±0.38 | 1.49±0.25 | 1.57±0.15 | 1.41±0.15 |  | 1.81±0.06 | 1.41±0.28* | 1.49±0.34 | 1.53±0.38 | 1.43±0.20* |
| LVIDs, mm | 4.25±0.68 | 6.00±0.97* | 5.22±0.67 | 5.43±0.62 | 5.74±1.37* |  | 4.59±0.50 | 6.72±1.19* | 5.77±0.86 | 5.99±1.42* | 5.87±1.35 |
| LVIDd, mm | 7.24±0.45 | 8.28±0.72 | 7.79±0.49 | 7.97±0.71 | 8.00±1.14 |  | 7.84±0.50 | 9.32±0.83* | 8.28±0.93# | 9.24±0.85* | 8.49±0.97 |
| LVPWs, mm | 2.57±0.21 | 2.67±0.27 | 2.57±0.24 | 2.78±0.18 | 2.23±0.34#$ |  | 3.06±0.26 | 2.56±0.39* | 2.65±0.16* | 3.22±0.35#& | 2.71±0.17$ |
| LVPWd, mm | 1.47±0.10 | 1.80±0.19* | 1.54±0.23# | 1.80±0.14*& | 1.46±0.20#$ |  | 1.88±0.16 | 1.74±0.27 | 1.64±0.15 | 1.95±0.23& | 1.72±0.15 |
| LV VOLs, µl | 83.12±30.29 | 173.16±67.84 | 133.27±37.79 | 137.29±44.85 | 173.34±98.17 |  | 98.34±24.49 | 241.54±106.61* | 168.96±50.83 | 191.79±103.98 | 181.69±98.51 |
| LVVOLd, µl | 276.64±38.96 | 374.77±68.38 | 326.58±44.72 | 358.99±56.02 | 352.01±115.06 |  | 330.95±47.92 | 487.54±99.19* | 377.50±90.11# | 478.48±98.62*& | 398.50±100.93 |
| LV Mass, mg | 708.48±32.09 | 1020.52±151.86* | 834.12±136.48 | 1011.40±161.11* | 819.95±200.49 |  | 1111.80±164.28 | 1185.42±83.93 | 976.06±215.84 | 1353.74±368.41& | 1016.31±149.34$ |
| LV Mass cor, mg | 566.78±25.67 | 816.42±121.49* | 667.30±109.18 | 809.12±128.89* | 655.96±160.39 |  | 889.44±131.42 | 948.34±67.14 | 780.85±172.68 | 1082.99±294.73& | 813.05±119.47$ |
| EF, % | 70.53±7.93 | 54.87±11.53* | 59.58±8.40 | 60.58±8.45 | 53.49±10.49* |  | 70.47±4.69 | 52.07±9.61* | 55.91±6.55* | 61.73±14.39 | 56.86±11.99 |
| FS, % | 41.56±6.68 | 30.13±7.73* | 33.14±6.17 | 33.91±5.96 | 28.98±6.69* |  | 41.48±4.10 | 28.28±5.86* | 30.54±4.50* | 35.69±10.41 | 31.55±7.90* |

*: *P* < 0.05 vs. Sham; #: *P* < 0.05 vs. AMI + Vehicle; *&*: P < 0.05 vs. AM I+ DAPA Low; $: *P* < 0.05 vs. AMI + DAPA Med; n=5-9 for each group.

AMI: acute myocardial infarction; Cor, corrected; d, diastole; DAPA: dapaglifozin; EF, ejection fraction; FS, fractional shortening; IVS, thickness of interventricular septum; LA, left atrium; s, systole; LVID, left ventricular internal dimension; LVPW, thickness of left ventricular posterior wall; LV Mass, mass of left ventricle; LV VOL, left ventricular volume; Med: medium; mg: milligram; mm: millimeter.
